# Supplementary material for: The Origin and Genetic Variation of Domestic Chickens with Special Reference to Junglefowls Gallus g. gallus and G. varius
Source: PLOS journal article supplement (doi:10.1371/journal.pone.0010639), 2010-05-19
Supplement: S2 (10.1371/journal.pone.0010639.s002) [file journal.pone.0010639.s002]

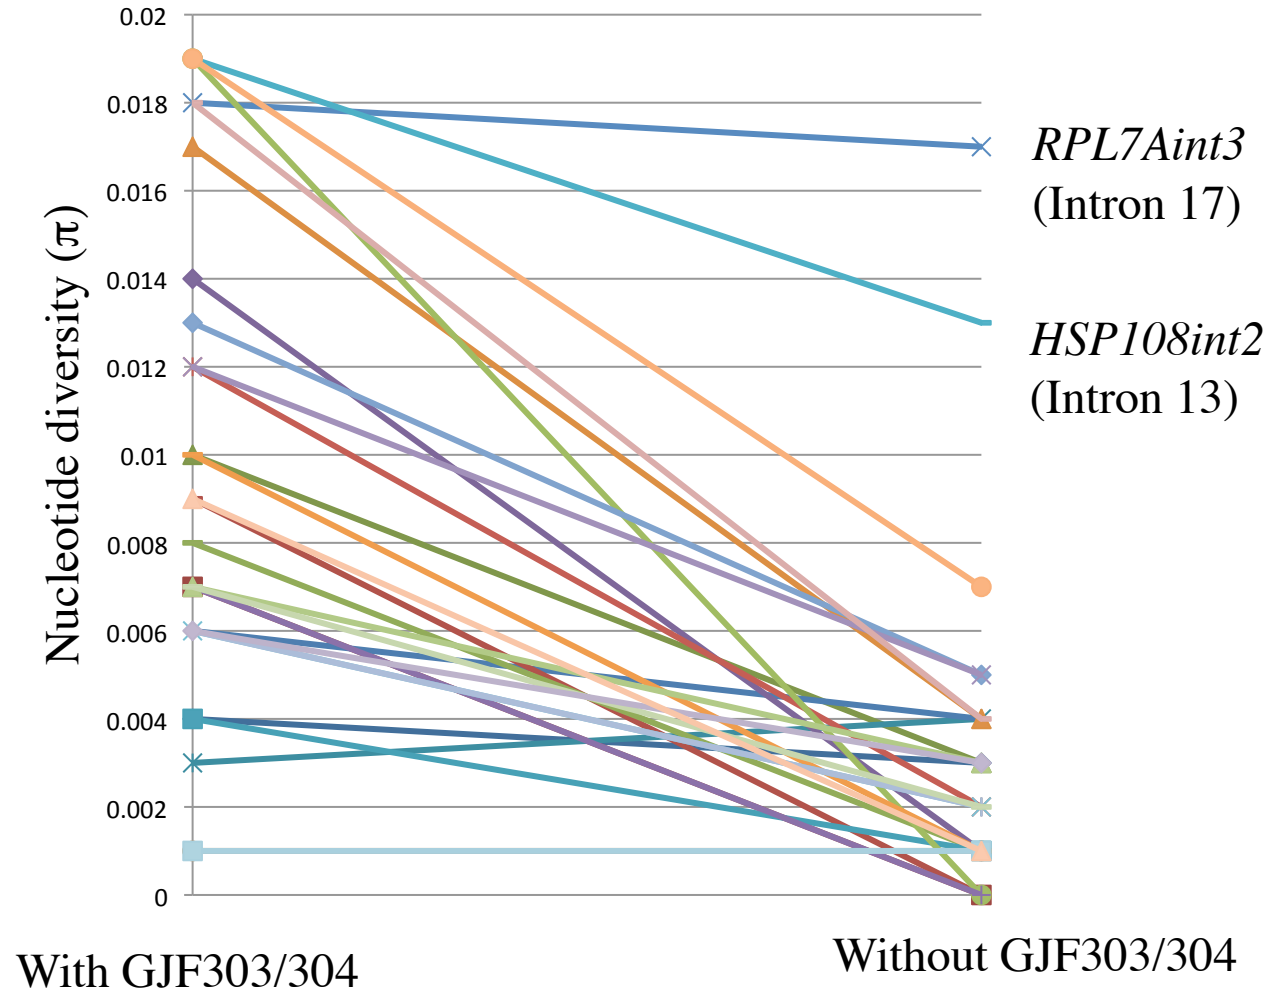

**Figure S2.** Effect of introgressed sequences from chickens to GJFs on the nucleotide diversity ( $\pi$ ) of GJFs.

$\pi$  values at each intron with and without GJF303/304 were located on both sides of the graph. Among 30 introns, intron 13 and 17 were only the exception where removal of introgressed sequences did not reduce the  $\pi$  value.
