# Supplementary material for: The Origin and Genetic Variation of Domestic Chickens with Special Reference to Junglefowls Gallus g. gallus and G. varius
Source: PLOS journal article supplement (doi:10.1371/journal.pone.0010639), 2010-05-19
Supplement: S4 (10.1371/journal.pone.0010639.s004) [file journal.pone.0010639.s004]

**Table S2.** Two sets of scale and shape parameters (a, b) of the gamma distribution in MCMC analyses and prior distribution (%).

| Parameters     | Set 1 <sup>a</sup> |                      | Set 2 <sup>b</sup> |                      |
|----------------|--------------------|----------------------|--------------------|----------------------|
|                | (a, b)             | Prior [95% interval] | (a, b)             | Prior [95% interval] |
| $\theta_C$     | 4, 650             | 0.62 [0.17, 1.35]    | 19, 7200           | 0.26 [0.16, 0.40]    |
| $\theta_R$     | 3, 580             | 0.52 [0.11, 1.25]    | 13, 12000          | 0.11 [0.06, 0.18]    |
| $\theta_G$     | 3, 320             | 0.94 [0.19, 2.26]    | 32, 9400           | 0.34 [0.23, 0.47]    |
| $\theta_{CR}$  | 4, 600             | 0.67 [0.18, 1.46]    | 26, 3600           | 0.72 [0.47, 1.03]    |
| $\theta_{RCG}$ | 4, 600             | 0.67 [0.18, 1.46]    | 114, 7100          | 1.61 [1.32, 1.91]    |
| $\tau_{CR}$    | 1,50000            | 0.002 [0, 0.007]     | 1, 11000           | 0.01 [0, 0.034]      |
| $\tau_{RCG}$   | 16, 2500           | 0.64 [0.37, 0.99]    | 113, 18000         | 0.63 [0.52, 0.75]    |

<sup>a</sup> Parameters were calculated based on observed data.

<sup>b</sup> Parameters were based on posteriors using parameters Set 1(see Table 4).
